# Supplementary material for: Combined aCGH and Exome Sequencing Analysis Improves Autism Spectrum Disorders Diagnosis: A Case Report
Source: MDPI journal article supplement (doi:10.3390/medicina58040522), 2022-04-07
Supplement: s1 [file s1]

**Table S1. Sequencing parameters obtained in each analyzed sample.**

|                                                                      | P             | M             | F             |
|----------------------------------------------------------------------|---------------|---------------|---------------|
| Number of sequenced bases                                            | 1,923,284,925 | 1,986,042,438 | 1,992,418,129 |
| Number of reads                                                      | 45,485,838    | 47,220,731    | 47,622,891    |
| Number of QF on target reads                                         | 33,241,855    | 34,943,225    | 35,242,003    |
| Percentage of QF on target reads                                     | 76,01%        | 76,97%        | 76,88%        |
| Median read depth in analyzable target regions                       | 60            | 68            | 68            |
| Average read depth in analyzable target regions                      | 66            | 61            | 61            |
| Percentage of analyzable target regions covered by at least 20 reads | 93,46%        | 93,05%        | 93,18%        |
| Total DNA variants                                                   | 50,146        | 50,094        | 49,495        |
| Exonic                                                               | 26,282        | 26,507        | 25,877        |
| Intronic                                                             | 2,007         | 1,982         | 1,946         |
| Filtered Variants                                                    |               | 48            |               |

P: proband; M: mother; F: father; QF: quality filters.
